# Supplementary figures and images for: Presymptomatic transmission of SARS-CoV-2 infection: a secondary analysis using published data
Source: PubMed Central journal article supplement — BMJ Open. 2021 Jun 28;11(6):e041240. doi: 10.1136/bmjopen-2020-041240 (PMC8245290; doi:10.1136/bmjopen-2020-041240), 2021-06-28

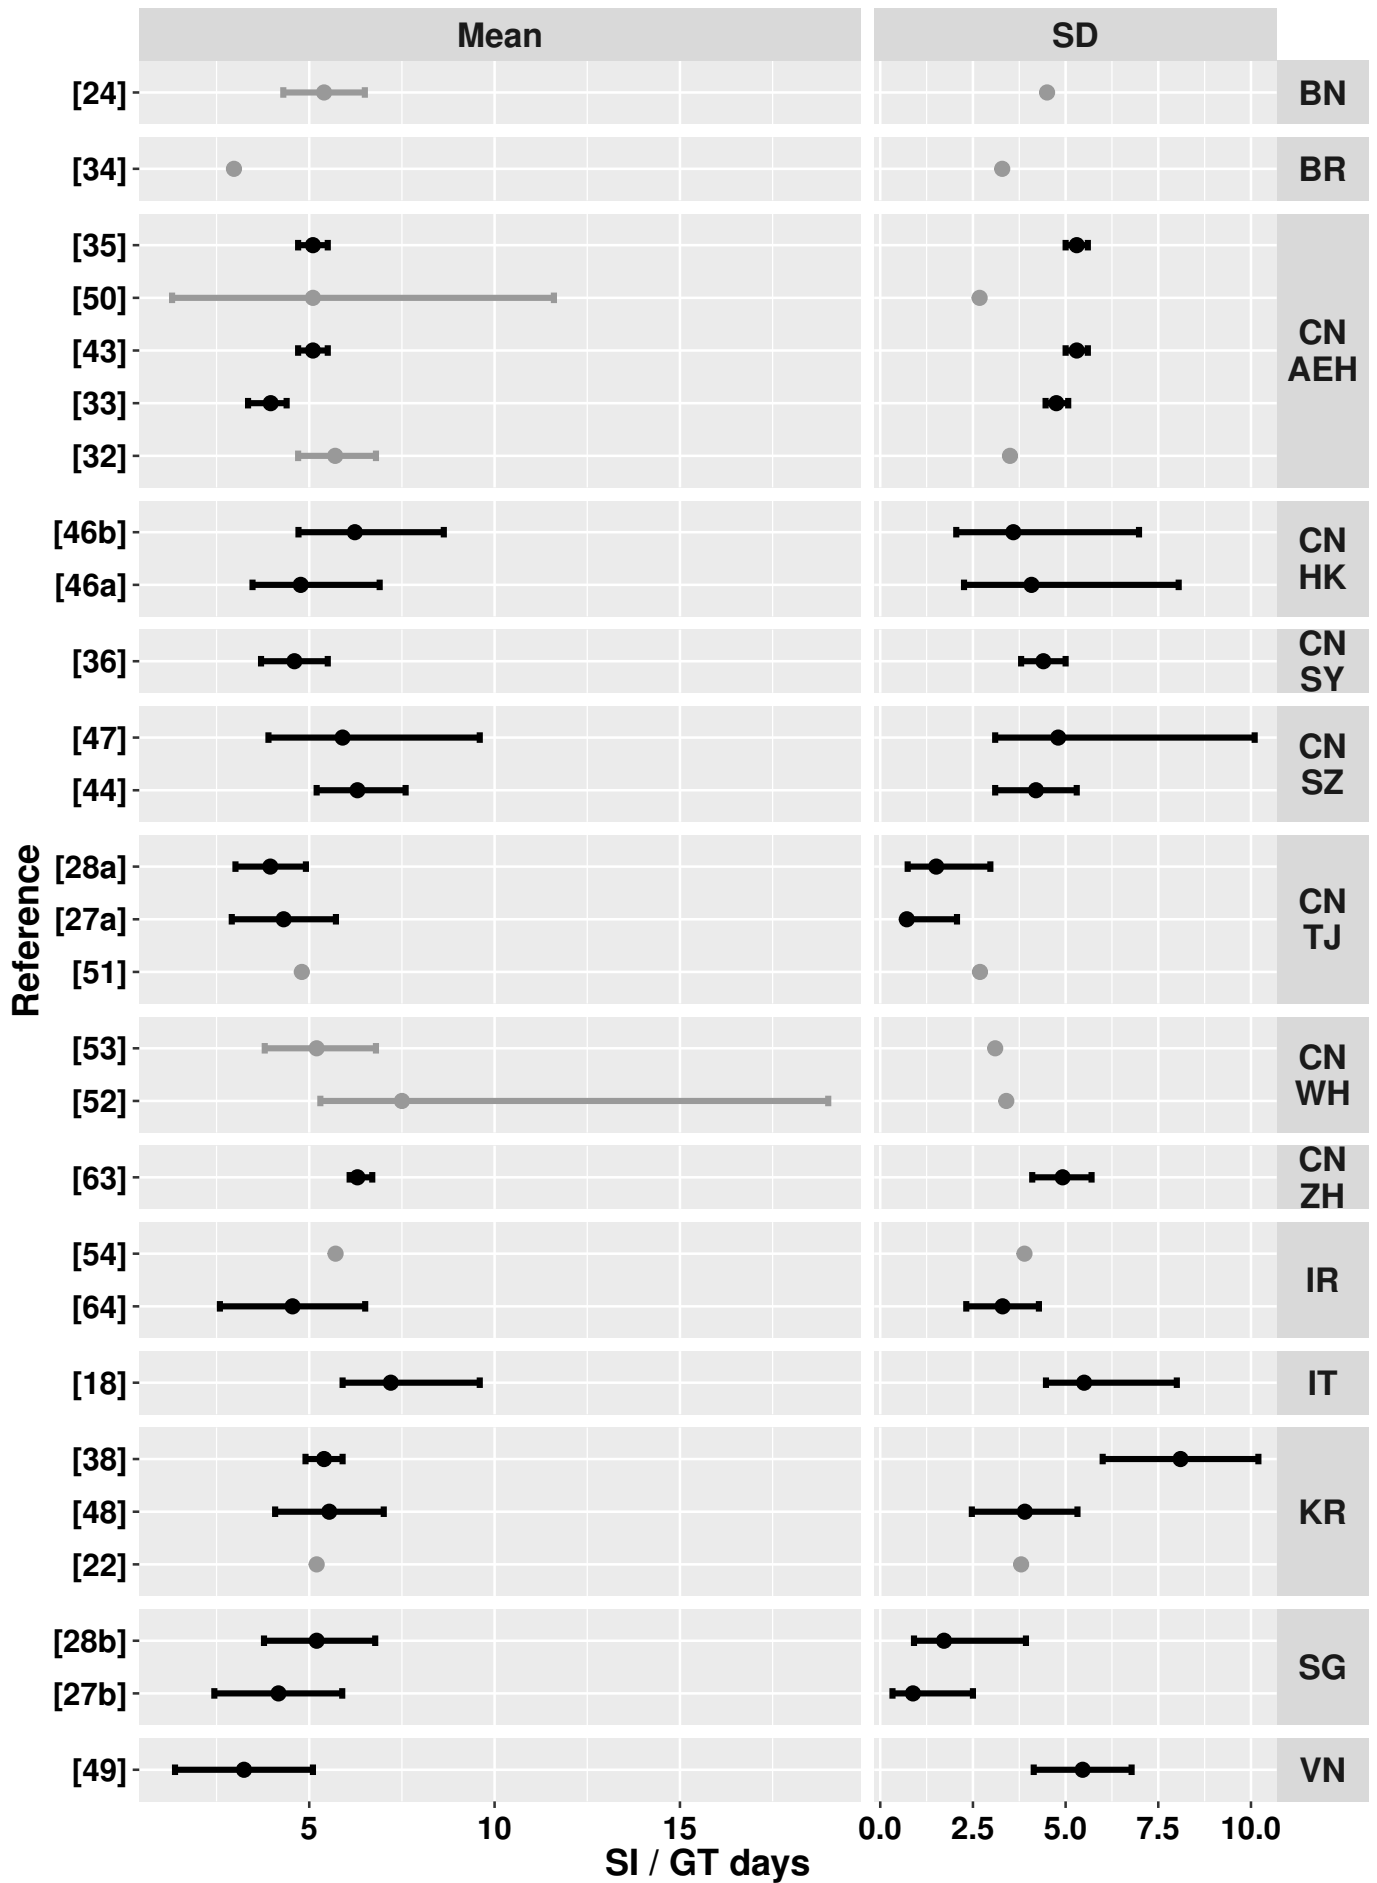

Supplement: bmjopen-2020-041240supp003.pdf [file bmjopen-2020-041240supp003.pdf]
